# Supplementary material for: Oncogenic allelic interaction in Xiphophorus highlights hybrid incompatibility
Source: PubMed Central journal article supplement — Proc Natl Acad Sci U S A. 2020 Nov 9;117(47):29786–94. doi: 10.1073/pnas.2010133117 (PMC7703647; doi:10.1073/pnas.2010133117), 2020-11-09
Supplement: pnas.2010133117.sapp.pdf [file pnas.2010133117.sapp.pdf]

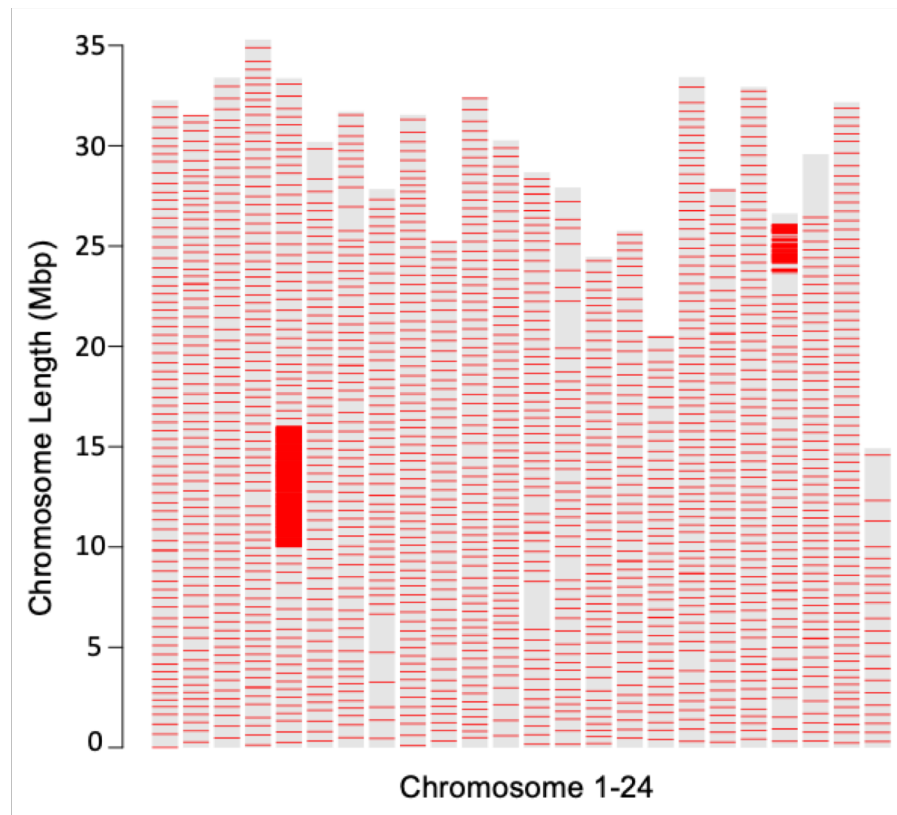

**Figure S1. Genomic locations of amplicons**

Chromosome plot showing the location of amplicons. Capture probes were designed to sequence the BC progeny genome with different coverage. A total of 2,017 probe sets were produced for amplicon sequencing: 406 sets of probe were designed to reach a resolution of 14.8 kbp within 6 Mbp candidate *R(Diff)* loci on chromosome 5 (chr 5: 10,000,000 – 16,000,000); 101 sets or capture probes were designed for 24.8 kbp definition for sex determining regions (chr 21: 23,750,000 – 26,250,000) that is close to *xmrk*; 1510 sets of probes were designed for genotyping and establish individual backcross progeny haploid map at definition of 459 kbp for the rest of the genome.

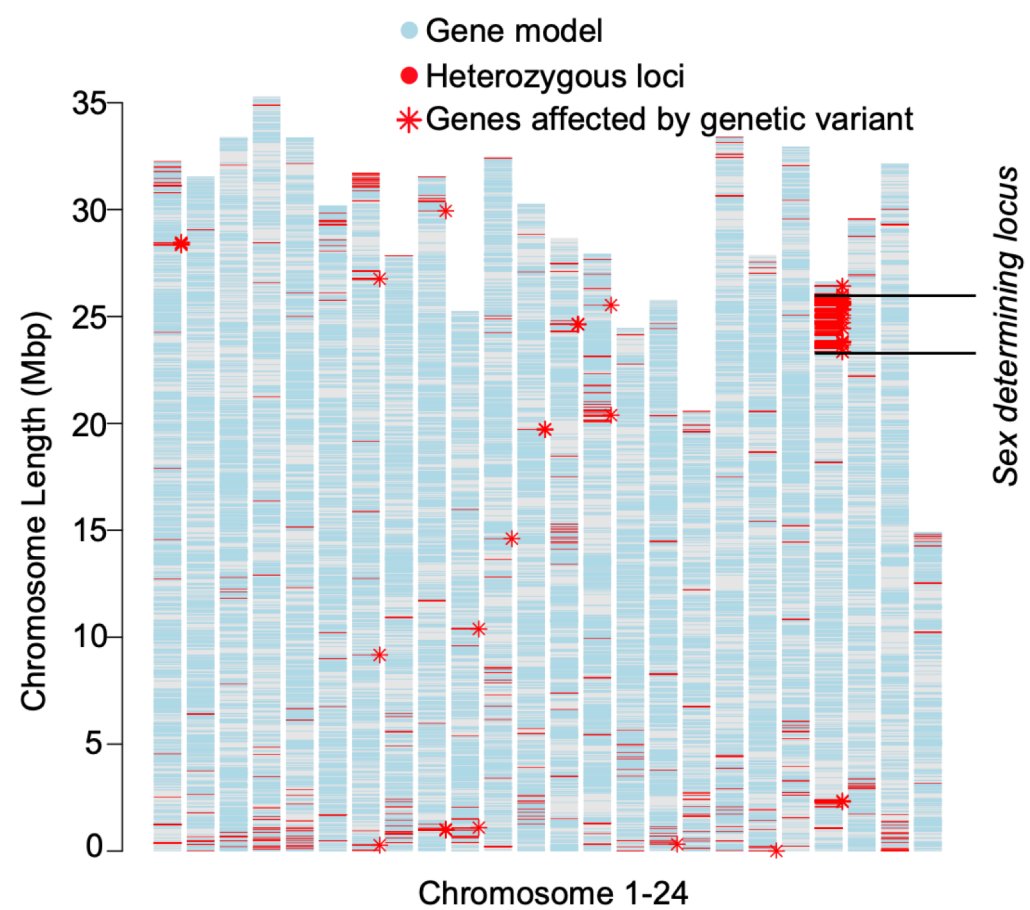

**Figure S2. Heterozygous loci in male *X. maculatus* genome**

Chromosome plot of heterozygous loci of *X. maculatus* genome. Heterozygous loci were identified using bcftool and varscan. Loci that are heterozygous in at least 75% of tested male *X. maculatus* are highlighted, with the one leading to non-synonymous codon change labeled with asterisks. *X. maculatus* exhibits a XY sex determining locus. This locus is known to be at the end of chromosome 21, close to *xmrk*.

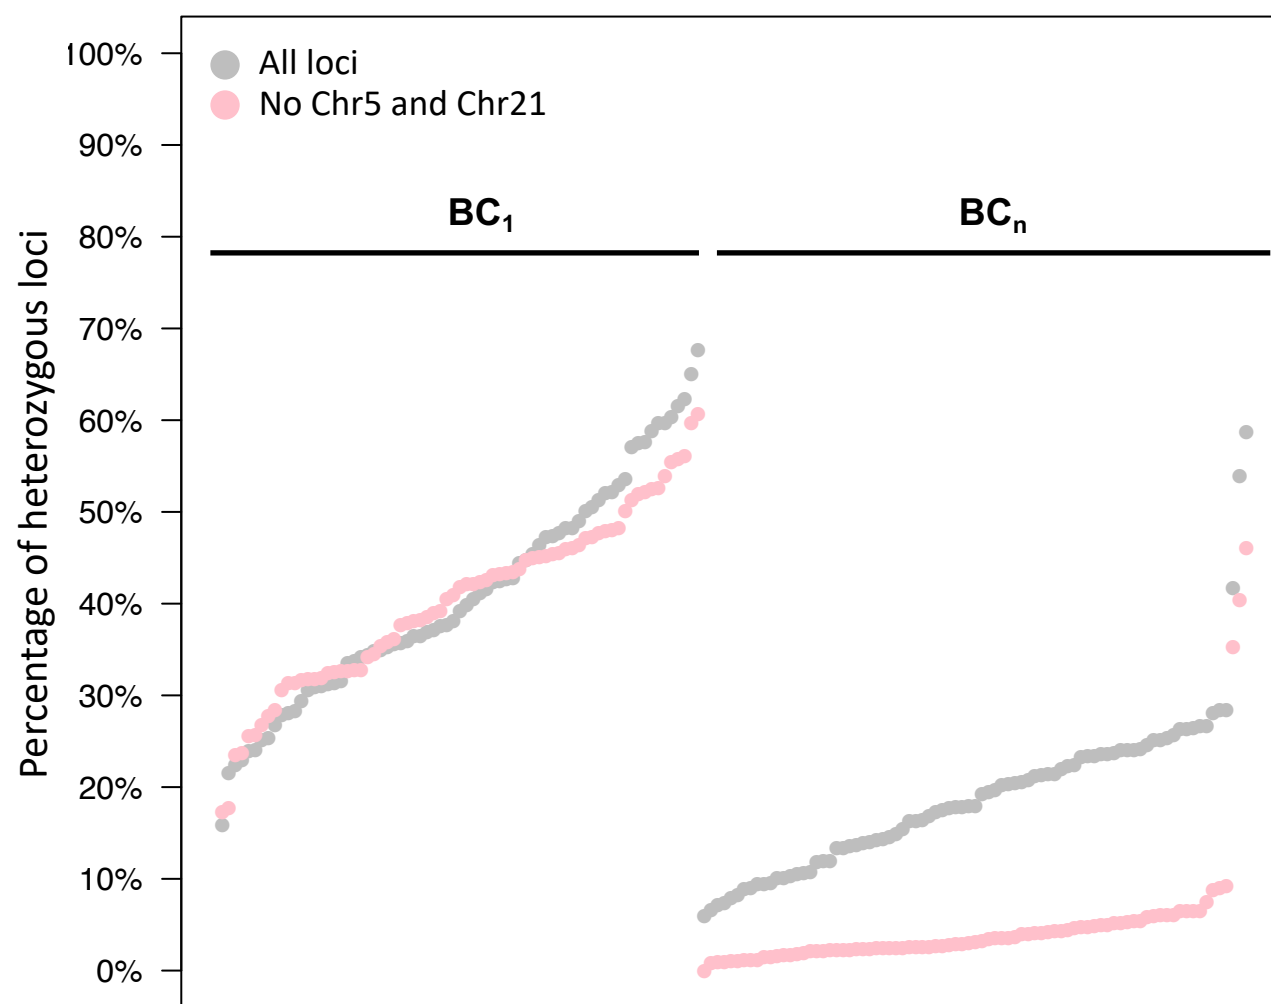

**Figure S3. Heterozygous loci in backcross interspecies hybrids**

Dot plot showing percentage of heterozygous loci in  $BC_1$  and  $BC_n$  (i.e.,  $BC_2$ - $BC_8$ ) hybrids. Heterozygous genotype refers to inheritance of both *X. maculatus* and *X. hellerii* alleles, and homozygous genotype refer to inheritance of only *X. hellerii* alleles. Each spot represents percentage of heterozygosity per BC individual. All percentages of  $BC_1$  and  $BC_n$  are ordered numerically. Gray spots represent percentages calculated using all genotype loci, and pink spots represent percentages calculated using only loci out of Chr5 and Chr21.

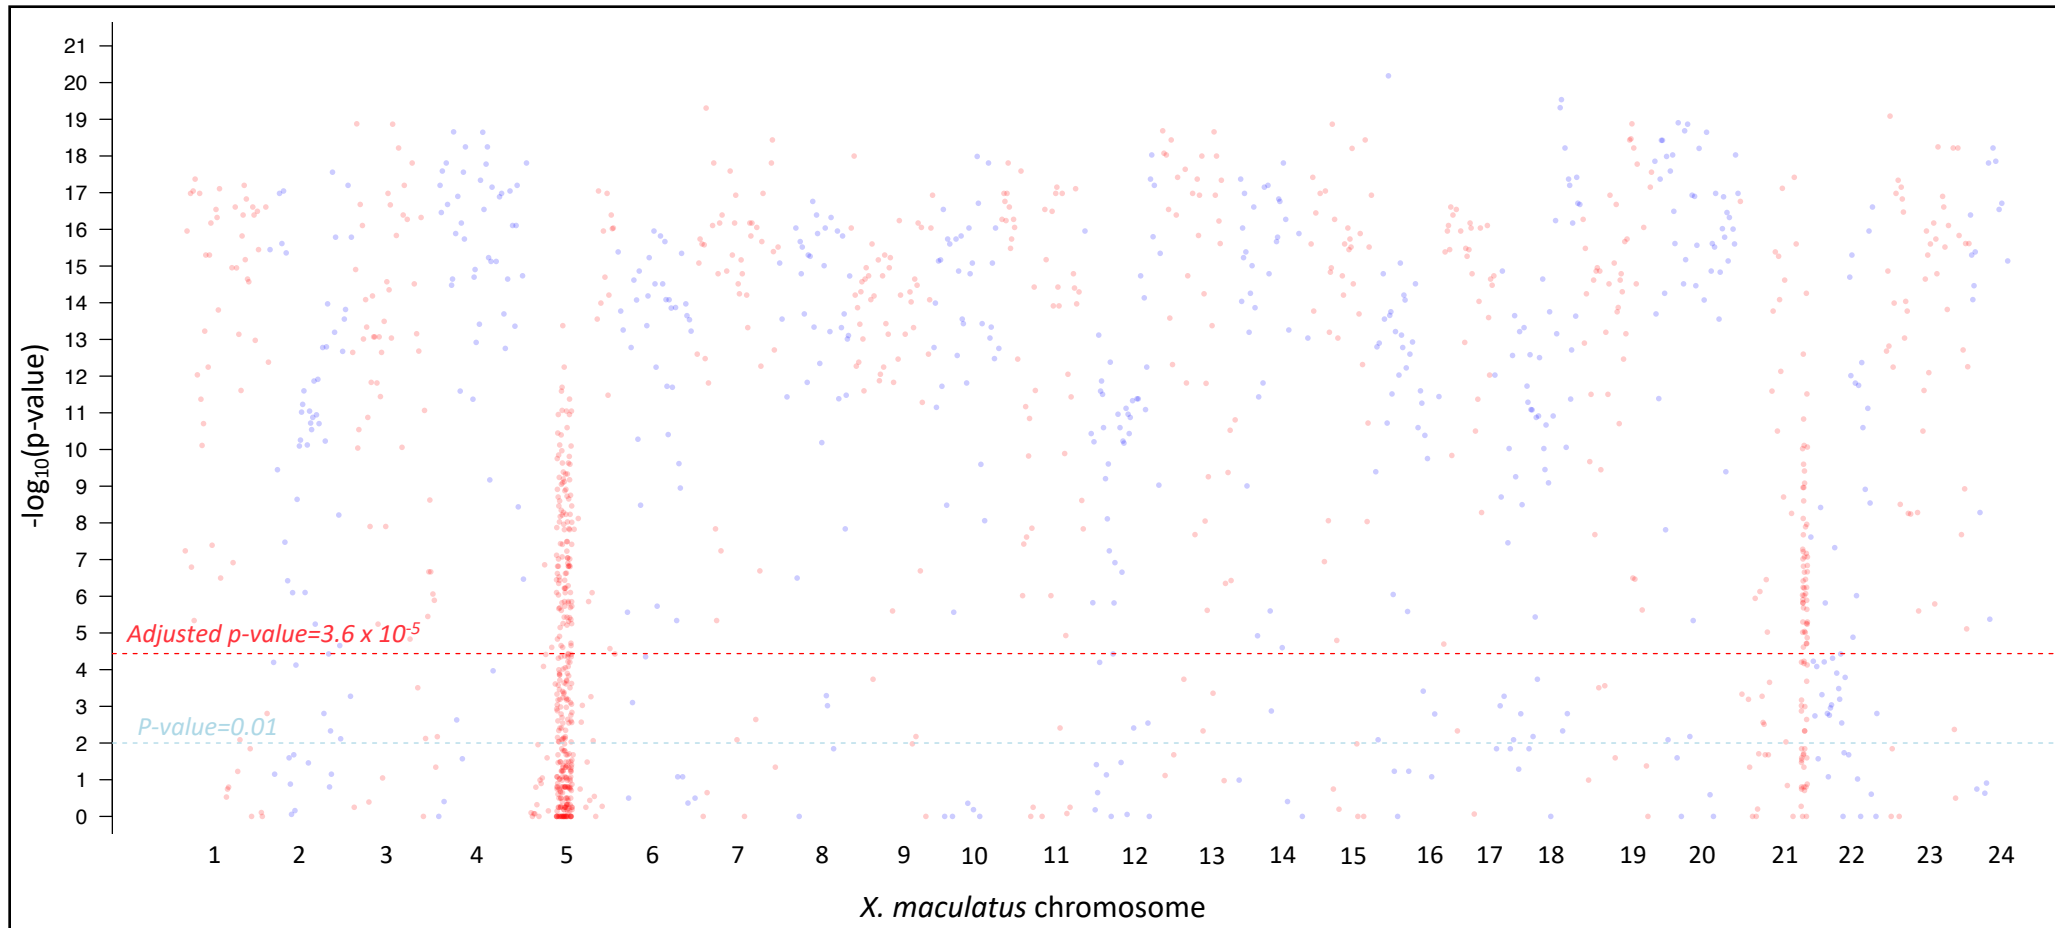

**Figure S4. Linkage disequilibrium in advanced backcross hybrids**

Manhattan plot showing  $-\log_{10}(\text{p-value})$  (Chisq-test) across the genome. Y-axis represents  $-\log_{10}(\text{p-value})$ , X-axis represents amplicon chromosomal coordinates, which is labeled as red or blue. Manhattan plot shows statistically significant linkage disequilibrium throughout the genome due to introgression. Light blue dash line represent p-value of 0.01 that is suggestive of statistical significance. Chisq-test p-values were corrected using Bonferroni method across the genome-wide data. Red dashed line represents adjusted p-value of 0.05 that is corresponding to  $3.6 \times 10^{-5}$ .

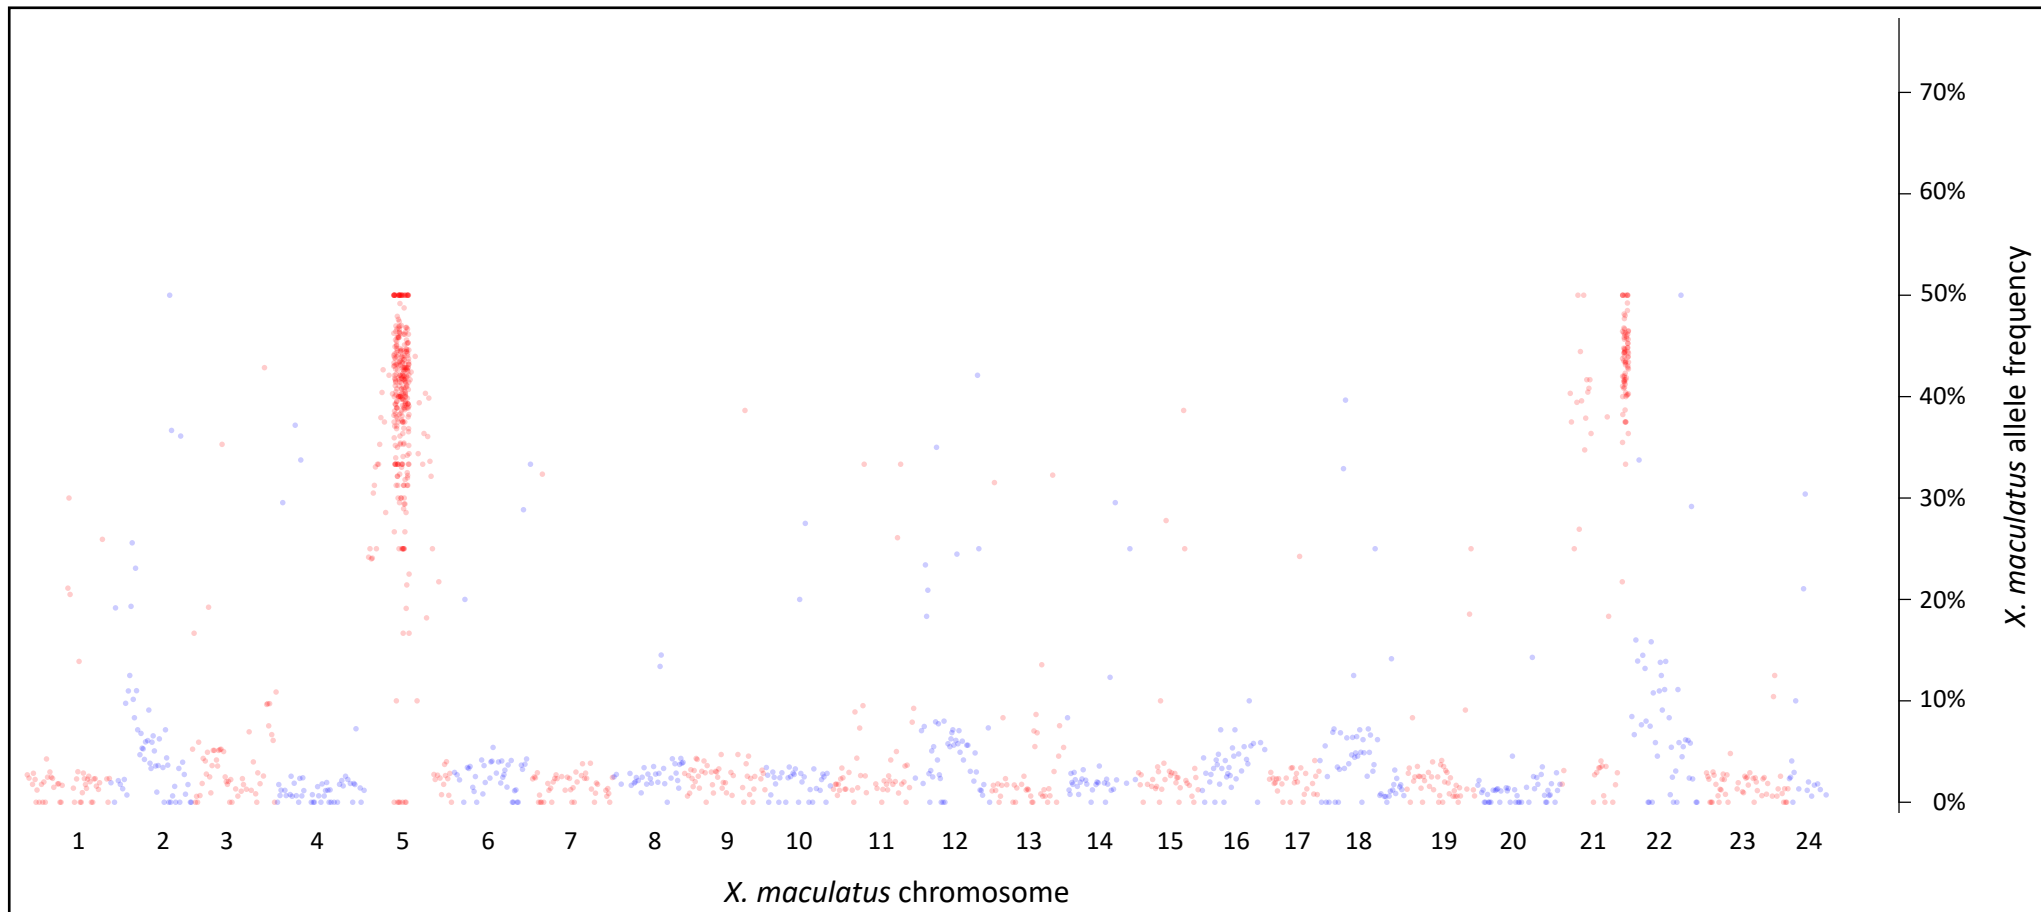

**Figure S5. *X. maculatus* allele frequency in advanced backcross hybrids**

*X. maculatus* allele frequencies of all sequenced polymorphic sites in advanced backcross hybrids are shown as dot plot. Red and blue colors represent different chromosomes (red: odd number; blue: even number). The maximum *X. maculatus* allele frequency in backcross progeny is 50% as observed in heterozygous loci, and minimum *X. maculatus* allele frequency is 0% in homozygous loci.

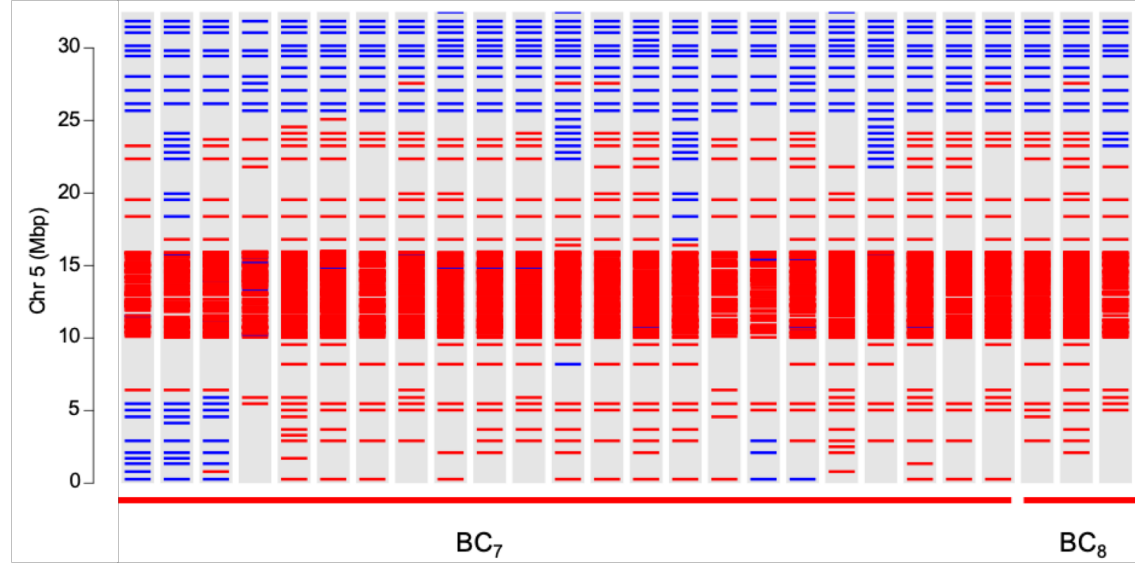

**Figure S6. Haploid maps of BC<sub>7-8</sub> chromosome 5**

Chr5 haploid maps for BC<sub>7</sub> and BC<sub>8</sub> hybrids. Blue bar represents homozygous genotype, and red bar represent heterozygous genotype. Locations of the colored bars represent chromosomal location of amplicons. Heterozygous regions, by calculation, should only account for a total of 5.5 or 2.7 Mbp of a 700 Mbp hybrid genome. These heterozygous loci should include both the locus surrounding *xmrk* and *R(Diff)*. The haploid map of BC<sub>7-8</sub> hybrid chromosome 5 show an average of 22 Mbp heterozygous region for BC<sub>7</sub>, and 23 Mbp heterozygous region for BC<sub>8</sub>. Chromosome 5 heterozygous loci of BC<sub>7</sub> and BC<sub>8</sub> are statistically different from the expected 5.5 and 2.7 Mbp heterozygous region lengths ( $p$ -values of  $1.18 \times 10^{-16}$  and  $2.4 \times 10^{-3}$ ; t-test, two-tailed).
